# Supplementary material
Source: Springer Nature journal article supplement (https://www.springermedizin.de/resource/supplementary/12904_2013_223_MOESM1_ESM.pdf/9517794)
Supplement: MOESM1 [file 9517794]

Interactions  
with the social environment:  
relationships, significant others

Functions

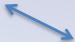

Reasons

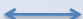

Meanings

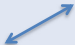

Motivation

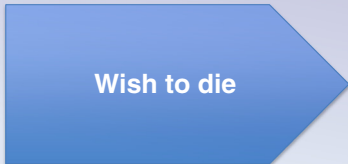

Intention

*Why?*

*How?*
